# Association of baseline inflammatory biomarkers with cancer mortality in the REGARDS cohort

This article has been corrected. Correction in [Oncotarget. 2020; 11:758-758](#).

Tomi Akinyemiju<sup>1</sup>, Justin X. Moore<sup>2</sup>, Daniel Tefera Dibaba<sup>3</sup>, Maria Pisu<sup>4</sup>, Michael Goodman<sup>5</sup>, Virginia J. Howard<sup>6</sup>, Monika Safford<sup>7</sup>, Susan C. Gilchrist<sup>8</sup>, Mary Cushman<sup>9</sup>, LeAnn Long<sup>10</sup> and Suzanne E. Judd<sup>10</sup>

<sup>1</sup>Department of Population Health Sciences, Duke University School of Medicine, Durham, NC, USA

<sup>2</sup>Division of Public Health Sciences and Siteman Cancer Center, Washington University School of Medicine, St. Louis, MO, USA

<sup>3</sup>Tennessee Clinical and Translational Science Institute, University of Tennessee Health Science Center, Memphis, TN, USA

<sup>4</sup>Division of Preventive Medicine, University of Alabama at Birmingham, Birmingham AL, USA

<sup>5</sup>Department of Epidemiology, Emory University Rollins School of Public Health, Atlanta, GA, USA

<sup>6</sup>Department of Epidemiology, University of Alabama at Birmingham, Birmingham AL, USA

<sup>7</sup>Department of Medicine, Weill Cornell Medical College, New York, NY, USA

<sup>8</sup>Department of Clinical Cancer Prevention and Cardiology, The University of Texas MD Anderson Cancer Center, Houston, TX, USA

<sup>9</sup>Department of Medicine and Vermont Cancer Center, Larner College of Medicine at the University of Vermont, Burlington, VT, USA

<sup>10</sup>Department of Biostatistics, University of Alabama at Birmingham, Birmingham, AL, USA

**Correspondence to:** Tomi Akinyemiju, **email:** [tomi.akinyemiju@duke.edu](mailto:tomi.akinyemiju@duke.edu)

**Keywords:** inflammatory biomarkers; racial disparities; cancer mortality; obesity

**Received:** December 12, 2018

**Accepted:** June 29, 2019

**Published:** August 06, 2019

**Copyright:** Akinyemiju et al. This is an open-access article distributed under the terms of the Creative Commons Attribution License 3.0 (CC BY 3.0), which permits unrestricted use, distribution, and reproduction in any medium, provided the original author and source are credited.

## ABSTRACT

**This study examines the association between inflammatory biomarkers and risk of cancer mortality by race. Data were obtained from 1,856 participants in the prospective REGARDS cohort who were cancer-free at baseline, and analyzed in relation to cancer mortality prospectively. Biomarkers were log-transformed and categorized into tertiles due to non-normal distributions, and Cox proportional hazard regression models were utilized to compute hazard ratios with 95% confidence intervals using robust sandwich methods. Individuals in the highest tertile of IL-6 had over a 12-fold increased risk of cancer mortality (HR: 12.97, 95% CI: 3.46–48.63); those in the highest tertile of IL-8 had over a 2-fold increased risk of cancer mortality (HR: 2.21, 95% CI: 0.86–5.71), while those in the highest tertile of IL-10 had over a 3-fold increased risk of cancer mortality (HR: 3.06, 95% CI: 1.35–6.89). In race-stratified analysis, each unit increase in IL-6 was associated with increased risk of cancer mortality among African-Americans (HR: 3.88, 95% CI: 1.17–12.88) and Whites (5.25, 95% CI: 1.24–22.31). If replicated in larger, racially diverse prospective cohorts, these results suggest that cancer patients may benefit from clinical or lifestyle approaches to regulate systemic inflammation as a cancer prevention strategy.**

## INTRODUCTION

The link between inflammation and cancer development and progression is well known, and while inflammation-associated cell proliferation alone does not cause cancer, sustained cell proliferation in a highly enriched inflammatory environment promotes

tumorigenesis [1]. Epidemiologic studies reveal that long-term aspirin and nonsteroidal anti-inflammatory drug use is associated with up to 40–50% reduced risk of colon cancers [2], 45% reduced risk of pre-menopausal breast cancer [3], and reduced risk of lung, esophagus and stomach cancers [4]. Other studies have shown that higher systemic inflammation significantly increases risk of cancer-related

mortality [5–7]. The molecular mechanisms explaining the association of inflammation and cancer risk have been the subject of much research [8–12]; however, questions remain regarding the role of specific cytokines as predictors of cancer mortality. Biomarkers of chronic inflammation [13] and cancer mortality rates vary significantly by race in the U.S [14], likely due to differences in socioeconomic status, behavioral factors such as diet and exercise, as well as access to quality healthcare [15–19]. Obesity is also an established predictor of cancer risk and mortality [20, 21], and recent studies including by our group [22], suggests that obesity-associated chronic inflammation may be an important prognostic risk factor for cancer mortality [23, 24]. CRP, an acute-phase protein synthesized in response to systemic inflammation, has also been well studied as a marker of overall inflammatory response [25], however it has not been well characterized in the context of cancer mortality disparities. Inflammation-related cytokines are easily measured from blood samples, and if shown to be independently associated with cancer mortality, may be useful as prognostic biomarkers for cancer. If racial differences exist in these associations, it may enhance understanding of the biological basis of racial disparities in cancer mortality. Few studies to date have examined the role of baseline circulating inflammatory cytokines and long-term risk of cancer mortality in a racially diverse prospective cohort. In the present study, we examined whether baseline biomarkers of inflammation increase the risk of overall and obesity-related cancer mortality among REGARDS participants overall and stratified by race.

## RESULTS

A total of 1,856 participants and 86 cancer deaths were observed during the study period with average follow up time of 6.5 (SD = 2.2) years, and about 32% of the cancer deaths were for obesity-related cancers. Higher baseline IL-6 was associated with older age, African-American race (51% vs. 35%,  $p < 0.01$ ), lower educational attainment (18% vs. 7%,  $p < 0.01$ ), lower income (23% vs. 11%,  $p < 0.01$ ), and greater proportion of current smokers (23% vs. 11%,  $p < 0.01$ ), Table 1. Higher baseline IL-8 was associated with older age, lower educational attainment (13% vs. 10%,  $p < 0.01$ ), current smoking (17% vs. 11%,  $p < 0.01$ ) and higher statin use (39% vs. 31%,  $p < 0.01$ ), and higher baseline CRP was also associated with African-American race (51% vs. 33%,  $p < 0.01$ ) and lower income (21% vs. 11%,  $p < 0.01$ ). Mean comorbidity score was associated with higher tertiles of each inflammatory biomarker examined. The distribution of each inflammatory biomarker are presented in Table 2; median IL-6, IL-8, and IL-10 values were 3.21, 2.63 and 9.48 pg/mL, respectively, and the median CRP value was 2.37 mg/L. The cancer types most commonly represented were lung (29%), gastrointestinal (22%), hematological (11%), and genitourinary cancers (9%).

In crude models (Table 3), every unit increase in log-transformed IL-6 was associated with a 3-fold higher risk of cancer mortality (HR: 3.15, 95% CI: 2.11–4.72) and a more than 4-fold higher risk of cancer mortality comparing the 3rd vs. 1st tertile (HR: 4.41, 95% CI: 2.45–7.95). After adjusting for age, sex, education, income, cancer site, and race, there was over a 6-fold increased risk of cancer mortality associated with the highest tertile of IL-6 (HR: 6.66, 95% CI: 2.70–16.43). The risk increased significantly to almost 13-fold after additionally adjusting for baseline health behaviors including physical activity, BMI, tobacco use, alcohol, and comorbidity score (HR: 12.97, 95% CI: 3.46–48.63). Higher levels of IL-8 were also associated with increased risk of cancer mortality after adjustment for study covariates when log-transformed (HR: 2.37, 95% CI: 1.14–4.91) and comparing the 3rd vs. 1st tertile (HR: 2.21, 95% CI: 0.86–5.71). IL-10 was associated with increased risk of cancer mortality when log-transformed (HR: 1.77, 95% CI: 1.26–2.48) and comparing 3rd vs. 1st tertile (HR: 3.06, 95% CI: 1.35–6.89) in fully adjusted models. Higher inflammatory biomarker index was associated with a 54% increased risk of overall cancer mortality (HR 1.54, 95% CI: 1.23–1.92) in fully adjusted models (Table 3). When restricted to obesity-associated cancers, IL-6 remained significantly associated with increased risk of cancer mortality (HR: 3.33, 95% CI: 1.61–6.87), but none of the other biomarkers remained significant in adjusted models (Table 4). When stratified by race (Table 5), log-transformed IL-6 was associated with almost a 4-fold increased risk among African-Americans (HR: 3.88, 95% CI: 1.17–12.88), and a 5-fold increased risk of cancer mortality among Whites (HR: 5.25, 95% CI: 1.24–22.31). There were no significant associations between CRP and cancer mortality in overall or race-stratified models.

## DISCUSSION

In this prospective cohort study of African-American and White participants within the REGARDS cohort, higher levels of baseline circulating IL-6 was associated with higher overall and obesity-associated cancer mortality. Higher baseline levels of IL-8 and IL-10 were also associated with cancer mortality overall but not in race stratified models. The strong associations observed for IL-6 remained statistically significant even after adjusting for socio-demographic and behavioral risk factors such as education, income, BMI, smoking, and alcohol intake, suggesting that baseline levels of this specific cytokines may independently and significantly contribute to increased mortality among cancer patients.

These findings are consistent with other studies reporting strong associations between pro-inflammatory cytokines such as IL-6, IL-8, and IL-10 with poor cancer outcomes [26–30]. Among studies evaluating cancer mortality outcomes in participants who were cancer-free

**Table 1: Baseline characteristics of REGARDs participants by levels of inflammatory biomarkers**

|                                        | Teriles of Inflammatory Biomarkers    |                     |                     |                     |                     |                     |                     |                     |
|----------------------------------------|---------------------------------------|---------------------|---------------------|---------------------|---------------------|---------------------|---------------------|---------------------|
|                                        | IL-6 (pg/ml)                          |                     | IL-8 (pg/ml)        |                     | IL-10 (pg/ml)       |                     | CRP (mg/L)          |                     |
|                                        | T1                                    | T3                  | T1                  | T3                  | T1                  | T3                  | T1                  | T3                  |
| Participants                           | 618                                   | 619                 | 618                 | 618                 | 619                 | 619                 | 619                 | 619                 |
| Weighted Participants                  | 10,796                                | 7652                | 9668                | 8533                | 9665                | 8702                | 9617                | 8347                |
|                                        | Presented as Column % or Median (IQR) |                     |                     |                     |                     |                     |                     |                     |
| Age at baseline, Median (IQR)          | 65<br>(56–72)                         | 69<br>(60–76)       | 64<br>(56–72)       | 70<br>(62–76)       | 66<br>(58–75)       | 70<br>(61–76)       | 68<br>(59–76)       | 67<br>(59–75)       |
| African-American Race, %               | 35.20                                 | 50.95               | 41.08               | 43.21               | 42.98               | 40.67               | 32.82               | 50.94               |
| Male Gender, %                         | 48.25                                 | 43.63               | 44.30               | 47.53               | 42.31               | 50.44               | 54.72               | 33.62               |
| Education < High School, %             | 7.28                                  | 18.05               | 10.12               | 13.54               | 14.09               | 13.05               | 7.66                | 16.16               |
| Income <\$20,000, %                    | 10.66                                 | 22.96               | 14.19               | 18.26               | 15.21               | 17.89               | 11.18               | 21.03               |
| No Exercise Activity, %                | 22.22                                 | 41.80               | 31.45               | 38.51               | 32.94               | 36.67               | 28.00               | 37.62               |
| BMI (kg/m <sup>2</sup> ), Median (IQR) | 26.9<br>(24.2–30.3)                   | 29.1<br>(25.7–33.9) | 28.8<br>(25.8–33.2) | 27.9<br>(24.3–32.1) | 28.4<br>(24.9–32.4) | 28.3<br>(24.9–32.3) | 26.5<br>(23.6–29.3) | 30.1<br>(26.2–34.9) |
| Current Smoking Status, %              | 10.75                                 | 22.71               | 11.14               | 17.04               | 15.74               | 14.17               | 14.31               | 14.59               |
| Heavy Alcohol Consumption, %           | 4.65                                  | 2.45                | 2.46                | 4.35                | 5.68                | 2.82                | 4.03                | 4.51                |
| Medication Use, %                      |                                       |                     |                     |                     |                     |                     |                     |                     |
| NSAIDs - Aspirin                       | 44.06                                 | 41.66               | 41.78               | 44.78               | 40.94               | 48.46               | 44.79               | 40.96               |
| Statins                                | 32.21                                 | 34.11               | 31.17               | 38.70               | 31.27               | 36.75               | 33.39               | 32.28               |
| Comorbid Conditions, %                 |                                       |                     |                     |                     |                     |                     |                     |                     |
| Atrial fibrillation                    | 10.50                                 | 8.30                | 6.57                | 10.67               | 7.08                | 9.34                | 8.70                | 8.47                |
| Chronic lung disease                   | 6.29                                  | 7.93                | 8.73                | 8.94                | 7.21                | 10.63               | 8.14                | 8.79                |
| Coronary artery disease                | 14.79                                 | 20.98               | 10.38               | 21.76               | 13.31               | 19.86               | 17.76               | 19.36               |
| Deep vein thrombosis                   | 4.72                                  | 8.29                | 6.00                | 4.76                | 5.48                | 7.03                | 4.08                | 6.85                |
| Diabetes                               | 20.46                                 | 29.58               | 17.53               | 29.83               | 20.47               | 28.56               | 20.67               | 25.67               |
| Dyslipidemia                           | 54.64                                 | 59.45               | 54.05               | 65.14               | 54.37               | 64.83               | 55.72               | 60.53               |
| Hypertension                           | 46.44                                 | 68.44               | 55.24               | 62.76               | 54.23               | 64.79               | 47.82               | 68.48               |
| Myocardial infarction                  | 11.00                                 | 17.30               | 8.51                | 14.93               | 10.01               | 15.09               | 13.52               | 14.86               |
| Peripheral artery disease              | 0.60                                  | 2.58                | 1.47                | 1.29                | 2.12                | 1.84                | 1.08                | 2.34                |
| Stroke                                 | 2.74                                  | 6.38                | 4.01                | 9.53                | 5.19                | 6.66                | 6.45                | 5.22                |
| Comorbidity Score, Mean (SD)           | 1.78 (1.39)                           | 2.41 (1.49)         | 1.87 (1.41)         | 2.39 (1.46)         | 1.95 (1.46)         | 2.39 (1.48)         | 1.91 (1.43)         | 2.36 (1.47)         |

% - Denotes weighted column percentages; IQR – Interquartile range; Comorbidity score is total of comorbidities, presented as mean and standard deviation (SD). Due to statistical weighting, most *p* values are significantly <0.01.

**Table 2: Inflammatory biomarkers distribution by tertiles**

| Biomarker     | N   | 1st Tertile | N   | 2nd Tertile | N   | 3rd Tertile   | Median (IQR)      |
|---------------|-----|-------------|-----|-------------|-----|---------------|-------------------|
| IL-6 (pg/mL)  | 618 | 0.62–2.51   | 619 | 2.51–4.11   | 619 | 4.11–12.31    | 3.21 (2.17–4.84)  |
| IL-8 (pg/mL)  | 618 | 0.11–2.15   | 620 | 2.16–3.25   | 618 | 3.26–281.18   | 2.63 (1.92–3.69)  |
| IL-10 (pg/mL) | 619 | 0.18–7.42   | 618 | 7.44–11.97  | 619 | 11.98–3806.61 | 9.48 (6.51–13.84) |
| CRP (mg/L)    | 619 | 0.15–1.31   | 618 | 1.32–3.93   | 619 | 3.95–111.00   | 2.37 (0.99–5.11)  |

at baseline, IL-6 and IL-8 were found to be important predictors of mortality. For instance, there was a 2-fold increased risk of overall cancer mortality and a 6-fold increased risk of lung cancer mortality comparing those in the highest quartiles of cytokine scores to the lowest [6]. Other studies also support the role of IL-8 in tumor initiation, proliferation, invasion, metastasis and poor

prognosis [31–34]. Other studies have also evaluated the role of circulating cytokines on cancer survival among cancer patients. A recent systematic review indicated that IL-6 was inversely correlated with cancer survival in 82 studies out of 101 studies [35], and a study among breast cancer patients observed that high levels of IL-8 was correlated with a higher tumor load, metastasis, accelerated

**Table 3: Hazard ratios (HR) and 95% confidence intervals (CI)<sup>1</sup> of inflammatory biomarkers for cancer deaths (*n* = 86, weighted *n* = 1340) among all participants**

|                                        | Log-Transformed  | T1           | T2               | T3                 | Inflammatory Index <sup>2</sup> |
|----------------------------------------|------------------|--------------|------------------|--------------------|---------------------------------|
| <b>IL-6 (pg/mL), <i>N</i> (Cases)</b>  |                  | 618 (16)     | 619 (27)         | 619 (43)           |                                 |
| <b>Weighted <i>N</i> (Cases)</b>       |                  | 10,796 (279) | 8449 (352)       | 7652 (709)         |                                 |
| Crude                                  | 3.15 (2.11–4.72) | Referent     | 2.29 (1.22–4.31) | 4.41 (2.45–7.95)   | 1.30 (1.15–1.46)                |
| Model 1                                | 3.91 (2.49–6.15) | –            | 0.97 (0.37–2.57) | 4.99 (2.30–2.57)   | 1.42 (1.16–1.73)                |
| Model 2                                | 4.70 (2.86–7.71) | –            | 1.31 (0.47–3.62) | 6.66 (2.70–16.43)  | 1.46 (1.20–1.78)                |
| Model 3                                | 4.05 (2.25–7.31) | –            | 2.55 (0.72–9.05) | 12.97 (3.46–48.63) | 1.54 (1.23–1.92)                |
| <b>IL-8 (pg/mL), <i>N</i> (Cases)</b>  |                  | 618 (20)     | 620 (27)         | 618 (39)           |                                 |
| <b>Weighted <i>N</i> (Cases)</b>       |                  | 9668 (233)   | 8697 (338)       | 8533 (769)         |                                 |
| Crude                                  | 1.45 (1.11–1.90) | Referent     | 1.56 (0.85–2.84) | 2.21 (1.26–3.87)   |                                 |
| Model 1                                | 2.00 (0.92–4.34) | –            | 0.92 (0.32–2.62) | 2.52 (1.04–6.12)   |                                 |
| Model 2                                | 2.16 (1.05–4.43) | –            | 0.77 (0.29–2.10) | 2.63 (1.13–6.10)   |                                 |
| Model 3                                | 2.37 (1.14–4.91) | –            | 0.60 (0.23–1.60) | 2.21 (0.86–5.71)   |                                 |
| <b>IL-10 (pg/mL), <i>N</i> (Cases)</b> |                  | 619 (33)     | 618 (22)         | 619 (31)           |                                 |
| <b>Weighted <i>N</i> (Cases)</b>       |                  | 9665 (482)   | 8530 (342)       | 8702 (516)         |                                 |
| Crude                                  | 0.96 (0.73–1.26) | Referent     | 0.75 (0.43–1.32) | 1.12 (0.67–1.86)   |                                 |
| Model 1                                | 1.52 (1.16–2.00) | –            | 1.46 (0.56–3.79) | 1.90 (0.90–4.02)   |                                 |
| Model 2                                | 1.51 (1.15–1.98) | –            | 1.14 (0.44–2.93) | 1.86 (0.91–3.80)   |                                 |
| Model 3                                | 1.77 (1.26–2.48) | –            | 1.87 (0.76–4.61) | 3.06 (1.35–6.89)   |                                 |
| <b>CRP (mg/L), <i>N</i> (Cases)</b>    |                  | 619 (26)     | 618 (30)         | 618 (30)           |                                 |
| <b>Weighted <i>N</i> (Cases)</b>       |                  | 9617 (362)   | 8933 (499)       | 8347 (479)         |                                 |
| Crude                                  | 1.18 (0.97–1.43) | Referent     | 1.28 (0.74–2.20) | 1.49 (0.86–2.58)   |                                 |
| Model 1                                | 1.10 (0.84–1.44) | –            | 1.04 (0.44–2.43) | 0.84 (0.38–1.89)   |                                 |
| Model 2                                | 1.19 (0.90–1.59) | –            | 1.20 (0.50–2.88) | 1.13 (0.44–2.94)   |                                 |
| Model 3                                | 1.16 (0.82–1.64) | –            | 1.41 (0.48–4.17) | 1.30 (0.45–3.77)   |                                 |

<sup>1</sup>Model 1: Adjusted for age, gender, education, income, and site; Model 2: Additionally adjusted for race; Model 3: Additionally adjusted for physical activity, BMI, smoking status, alcohol use, and comorbidity score; T1: 1st tertile; T2: 2nd tertile; T3: 3rd tertile.

<sup>2</sup>The inflammatory index is based on the summation of tertiles among four biomarkers (IL-6, IL-8, IL-10, and CRP), with scores ranging from 0 (lowest tertile in all biomarkers) to 8 (highest tertile in all biomarkers).

**Bold indicates significance at 0.05 alpha level.**

clinical course, and poorer post-relapse survival [36]. A meta-analysis of 21 studies also revealed that high IL-10 levels were associated with worse disease-free and overall survival in both solid and hematological cancer patients [37]. Other studies show significant correlations between IL-10 and aggressive tumor characteristics [38]; however, some studies reported a protective association of IL-10 on cancer survival [39, 40]. These conflicting results may be due to pleiotropic functions of IL-10 as both a pro- and anti-inflammatory cytokine.

Although we observed significant associations between IL-8 and IL-10 in the overall models, there were

non-significant associations in obesity-associated cancers or race-stratified models; it is possible that reduced sample size in the sub-group analysis may have limited statistical power to detect meaningful differences. In addition, while baseline IL-6 was associated with higher cancer mortality overall and among African-Americans and Whites in this study, the association between IL-10 and cancer mortality remained significant only among Whites in our study. The majority of studies evaluating racial differences in the association between chronic inflammation and cancer outcomes have focused on survival outcomes among cancer patients. For instance, IL-6 was associated with

**Table 4: Hazard ratios (HR) and 95% confidence intervals (CI) of death due to obesity-related cancers by baseline inflammatory biomarkers**

|                                 | Log-Transformed         |
|---------------------------------|-------------------------|
| <b>IL-6 (pg/mL), N (Cases)</b>  | 1856 (32)               |
| <b>Weighted N (Cases)</b>       | 26,897 (429)            |
| (Crude)                         | <b>3.52 (1.86–6.67)</b> |
| Model 1                         | <b>2.87 (1.44–5.69)</b> |
| Model 2                         | <b>3.33 (1.61–6.87)</b> |
| <b>IL-8 (pg/mL), N (Cases)</b>  | 1854 (32)               |
| <b>Weighted N (Cases)</b>       | 26,898 (429)            |
| (Crude)                         | <b>1.53 (1.01–2.31)</b> |
| Model 1                         | 1.38 (0.79–2.40)        |
| Model 2                         | 1.38 (0.76–2.50)        |
| <b>IL-10 (pg/mL), N (Cases)</b> | 1856 (32)               |
| <b>Weighted N (Cases)</b>       | 26,897 (429)            |
| (Crude)                         | 0.78 (0.46–1.35)        |
| Model 1                         | 0.58 (0.28–1.21)        |
| Model 2                         | 0.58 (0.27–1.23)        |
| <b>CRP (mg/L), N (Cases)</b>    | 1856 (32)               |
| <b>Weighted N (Cases)</b>       | 26,897 (429)            |
| (Crude)                         | 0.98 (0.74–1.29)        |
| Model 1                         | 0.97 (0.70–1.35)        |
| Model 2                         | 0.97 (0.69–1.37)        |

Model 1: Adjusted for age, gender, education, and income; Model 2: Additionally adjusted for race. Bold indicates significance at 0.05 alpha level. The obesity-related cancers included were cancers of the breast, colorectum, kidney, liver, pancreas, gastro-intestinal, endometrium, and esophagus.

poorer survival in both African-American and White lung cancer patients, while IL-10 and IL-12 were associated with poorer survival only among African-American lung cancer patients [41]. We did not observe a significant association between CRP and cancer mortality overall or by race, similar to other published studies using prospective cohort data [42, 43]. This study adds important information relating to the role of specific biomarkers of chronic inflammation measured at baseline with risk of cancer mortality prospectively. Results show that measures of chronic inflammation obtained many years prior to cancer death, in this case an average of 6 years between cancer-free entry into the study cohort to cancer death, may have important predictive value for cancer outcomes.

The biological mechanisms through which specific cytokines are associated with cancer mortality has been widely investigated. Th2 cytokines such as IL-6 and IL-10 enhance motility and survival of highly tumorigenic cancer stem cells and thus metastasis [44], while IL-8 is involved in the regulation of angiogenesis, cancer cell growth and survival, tumor cell motion, leukocyte infiltration, and modification of immune responses [45]. IL-6 and IL-10 are believed to influence tumor

progression by activating Janus Kinase (JAK) causing the phosphorylation of signal transducer and activation of transcription 3 (STAT3), initiation and transcription of STAT3 target genes including cyclin D1, Bcl-xL, c-myc, Mcl1 and vascular endothelial growth factor (VEGF) [46]. As an immune-suppressive cytokine, IL-10 promotes tumor cell proliferation and metastasis [37, 47]. Our study suggests that if validated as a useful biomarker of cancer mortality, clinical or lifestyle strategies focusing on regulating chronic inflammation among cancer patients may be a promising cancer prevention approach, and may contribute to improved risk-stratification by identifying which patients are at higher risk of mortality and require more intensive treatment and follow-up.

The strength of this study includes the prospective design that minimized potential reverse causality where diagnosis of cancer could influence biomarker levels, and objective measures of chronic inflammatory biomarker. While we could not rule out the possibility that some latent cancers might be present at baseline, to participate in the REGARDS study, participants had to be free of cancer at baseline, so this is likely to have minimal effect. The availability of data on both African-Americans and Whites



**Table 5: Hazard ratios (HR) and 95% confidence intervals (CI) of death due to obesity-related cancers by baseline inflammatory biomarkers**

|                                 | African-American participants<br>(N=813, weighted N = 11,145) |                          |                          | White participants<br>(N=1043, weighted N = 15,752) |                          |
|---------------------------------|---------------------------------------------------------------|--------------------------|--------------------------|-----------------------------------------------------|--------------------------|
|                                 | P                                                             | Log-transformed          | T3                       | Log-transformed                                     | T3                       |
| <b>IL-6 (pg/mL), N (Cases)</b>  |                                                               |                          | 304 (21)                 |                                                     | 315 (22)                 |
| <b>Weighted N (Cases)</b>       |                                                               |                          | 3899 (341)               |                                                     | 3753 (368)               |
| Crude                           |                                                               | <b>3.14 (1.79–5.52)</b>  | <b>6.03 (2.05–17.78)</b> | <b>3.06 (1.72–5.45)</b>                             | <b>3.90 (1.88–8.08)</b>  |
| Model 1                         | 0.749                                                         | <b>4.57 (1.44–14.49)</b> | 4.04 (0.49–33.20)        | <b>3.34 (1.52–7.35)</b>                             | <b>3.61 (1.02–12.83)</b> |
| Model 2                         | 0.041                                                         | <b>3.88 (1.17–12.88)</b> | 5.66 (0.58–55.52)        | <b>5.25 (1.24–22.31)</b>                            | –                        |
| <b>IL-8 (pg/mL), N (Cases)</b>  |                                                               |                          | 300 (23)                 |                                                     | 318 (16)                 |
| <b>Weighted N (Cases)</b>       |                                                               |                          | 3687 (450)               |                                                     | 4846 (320)               |
| Crude                           |                                                               | <b>2.00 (1.26–3.16)</b>  | <b>2.45 (1.13–5.30)</b>  | 1.17 (0.82–1.66)                                    | 1.93 (0.85–4.38)         |
| Model 1                         | 0.223                                                         | 0.99 (0.52–1.91)         | 3.93 (0.92–16.69)        | 2.19 (0.69–6.94)                                    | 1.83 (0.56–5.95)         |
| Model 2                         | 0.013                                                         | 2.66 (0.54–13.13)        | 1.88 (0.19–18.63)        | 1.26 (0.21–7.72)                                    | 1.58 (0.25–9.92)         |
| <b>IL-10 (pg/mL), N (Cases)</b> |                                                               |                          | 281 (16)                 |                                                     | 338 (15)                 |
| <b>Weighted N (Cases)</b>       |                                                               |                          | 3539 (244)               |                                                     | 5163 (272)               |
| Crude                           |                                                               | 0.82 (0.53–1.27)         | 1.18 (0.58–2.39)         | 1.09 (0.82–1.45)                                    | 1.07 (0.52–2.23)         |
| Model 1                         | 0.119                                                         | 1.08 (0.59–1.99)         | 0.51 (0.15–1.82)         | <b>1.94 (1.24–3.04)</b>                             | <b>5.29 (1.51–18.56)</b> |
| Model 2                         | 0.093                                                         | 1.48 (0.61–3.61)         | 1.56 (0.23–10.53)        | 1.97 (0.89–4.34)                                    | 6.18 (0.94–40.39)        |
| <b>CRP (mg/L), N (Cases)</b>    |                                                               |                          | 325 (18)                 |                                                     | 294 (12)                 |
| <b>Weighted N (Cases)</b>       |                                                               |                          | 4252 (300)               |                                                     | 4095 (179)               |
| Crude                           |                                                               | 1.14 (0.85–1.53)         | 1.50 (0.69–3.27)         | 1.18 (0.93–1.51)                                    | 1.31 (0.59–2.90)         |
| Model 1                         | 0.915                                                         | 1.06 (0.70–1.60)         | 0.33 (0.08–1.45)         | 1.41 (0.79–2.52)                                    | 3.43 (0.68–17.22)        |
| Model 2                         | 0.426                                                         | 0.92 (0.55–1.54)         | 0.30 (0.03–3.36)         | 1.59 (0.44–5.74)                                    | –                        |

Model 1: Adjusted for age, gender, education, income, and site; Model 2: Additionally adjusted for physical activity, BMI, smoking status, alcohol use, and comorbidity score; T3: 3rd tertile vs. 1st tertile (referent). Bold indicates significance at 0.05 alpha level. P is the *p*-value for interaction between the log of the biomarker and race. (–) Denotes unreliable parameter estimates and associated 95% confidence intervals.

enabled stratified analysis by race; however, limited sample size in the race-stratified analyses may have limited our statistical power. The limitations of our study include potential over-representation of fatal cancers such as lung, pancreatic and ovarian cancers due the relatively short follow-up period, under-representation of more indolent breast and prostate cancers that require longer follow-up duration, and the limited number of cancer deaths that precluded analysis of site-specific mortality. In addition, we were unable to assess the association between baseline inflammatory biomarkers and cancer incidence as the REGARDS cohort was designed to examine long-term risk factors for stroke. Future studies utilizing the REGARD cohorts could aim to retrospectively collect data on incident cancer cases. We were also underpowered to detect associations between cytokines and mortality from obesity-related cancers in race-stratified analysis.

In conclusion, baseline measures of IL-6, a biomarker of chronic inflammation, and higher overall inflammatory biomarker index was associated with increased risk of cancer mortality in this racially diverse prospective cohort.

## METHODS

### Study participants

Data were obtained from the REGARDS (REasons for Geographic and Racial Differences in Stroke) cohort of 30,239 participants who were recruited between January 2003 and October 2007. Participants were aged ≥ 45 years at baseline, 45% male, 41% African-American, and 69% were >60 years old. The REGARDS cohort was originally designed to assess stroke risk between African

American and non-Hispanic White Americans, and thus the study oversampled African American individuals and did not include participants of other race/ethnicities. Covariates including demographics and behavioral factors were assessed, and blood was collected at baseline as part of comprehensive physical examinations. Participants were followed-up prospectively to identify medical events, hospitalizations or deaths, and routine linkages with the national databases were used to ascertain mortality outcomes. Full details regarding the REGARDS cohort methodology has been described previously [48–50]. In the present study, a stratified random sub-cohort sample of 1,856 participants with biomarker data who were free of cancer at baseline was analyzed. The sub-cohort was selected based on a stratified random sample designed to represent the entire REGARDS cohort on race (50% African-American), sex (50% women), age (20% 45–54 years, 20% 55–64 years, 25% 65–74 years, 25% 75–84 years, and 10%  $\geq$  85 years), and region (30% from Stroke Belt, 20% from Stroke Buckle, and the remaining from Non-Belt regions). Stroke Belt regions are eight states in the US with higher (with average stroke mortality higher by  $\sim$ 20% than elsewhere in the US) stroke risk and include Alabama, Arkansas, Georgia, Louisiana, Mississippi, North Carolina, South Carolina, and Tennessee [51, 52]. Stroke Buckle regions are coastal states within the Stroke Belt with even more higher stroke mortality (about 40% higher stroke mortality than elsewhere in the US) and include Georgia, North Carolina, and South Carolina [52]. The Non-Belt regions are other contiguous states.

### Main exposure variables

In this study we examined the association between baseline circulating biomarkers for inflammation based on prior studies [26–30] and availability within the REGARDS cohort in relation to cancer mortality assessed prospectively. Biomarkers were assessed from blood samples collected during baseline physical examination, and analyzed in the REGARDS central laboratory at the University of Vermont, Burlington, VT, USA. IL-6 was measured using ultra-sensitive ELISA (Quantikine HS Human IL-6 Immunoassay, R&D Systems, Minneapolis, MN, USA); IL-8 was measured using Human Serum Adipokine Panel B LINCoplex Kit (Linco Research, Inc., St. Charles, MO, USA); and IL-10 was measured using Milliplex MAP Human Cardiovascular Disease (CVD) Panel 3 (Millipore Corporation, Billerica, MA, USA) run as a singleplex assay. A validated high-sensitivity particle-enhanced immunonephelometric assay on the BN II nephelometer (N High Sensitivity CRP, Dade Behring Inc., Deerfield, IL, USA) was used to measure CRP. The laboratory analytical intra- and inter-assay coefficient of variation (CV) for the biomarkers ranged from 1.4 to 8.1% and  $<$  21%, respectively.

### Cancer mortality outcome

Trained REGARDS study personnel contacted participants by telephone every six-months during follow-up to identify any hospitalizations or death experienced by study participants. REGARDS investigators reviewed death certificates and interviewed proxies to delineate the primary cause of death. Further, cancer deaths occurring during follow up were identified either through death certificates, medical records, or interviewed proxies and verified through linkages with the Social Security Deaths Index (SSDI) as well as the National Death Index (NDI) following national guidelines [53]. The accuracy of SSDI and NDI has been validated before with accuracies ranging from 82–100% [54–56]. As a secondary outcome, we defined obesity-related cancer deaths as cancer deaths of the breast, colon and rectum, kidney, liver, pancreas, gastrointestinal, endometrium, and esophagus, using the International Agency for Research on Cancer definitions [57, 58]. Participants were followed-up through the date of death, or last telephone follow-up (December 31, 2012). Participants who did not die of cancer by the last date of follow-up were right censored.

### Covariates

Socio-demographic variables included in the analysis were age (continuous), sex (female/male); education (less than high school, high school, some college, or college plus), income (annual income, categorical), and race (African-American/White). Body mass index ((BMI),) was assessed during baseline physical examination. Behavioral variables included in the analysis were physical activity (none, 1–3 times/week, or  $\geq$ 4 times/week), smoking (never, past, or current user), and alcohol intake (light, moderate or heavy intake). Cancer site and comorbidity score (mean number of comorbid conditions present at baseline) were also included in analysis.

### Statistical analysis

Biomarkers that were non-normally distributed were log-transformed and categorized into tertiles for analysis. Baseline participants characteristics were compared across tertiles of each biomarker using Chi-square and Kruskal-Wallis tests as appropriate, and the Cox proportional hazards regression with robust sandwich estimation method was used to estimate hazard ratios (HRs) and 95% confidence intervals (CIs) in sequentially adjusted models. Model 1 adjusted for baseline age, sex, education, income, and cancer site; model 2 further adjusted for race except in race stratified model; and model 3 further adjusted for baseline physical activity, BMI, smoking, alcohol, and comorbidity score. Statistical interactions between each biomarker and race were also evaluated, and race-stratified models were presented. Participants were censored at the date of death due to other reasons, loss to follow-up, or

December 31, 2012, whichever happened first. SAS version 9.4 (Cary, NC, USA) was used for all statistical analysis. *P* values  $\leq 0.05$  were considered statistically significant and for interaction terms, *P* values  $\leq 0.1$  were considered statistically significant. The institutional review boards of all participating institutions approved this study.

### Sensitivity analysis

In sensitivity analysis, we created an inflammatory biomarker index based on the summation of tertiles among the four studied biomarkers (i.e., IL-6, IL-8, IL-10, and CRP). The range of this index were from zero to eight, as the lowest score a participant could have for each biomarker were zero and highest were 2 (i.e., tertile one = 0 points, tertile two = 1 point, and tertile three = 2 points). Thus, if a participant had biomarkers in the highest tertile for all four biomarkers then their respective index was eight. Likewise, if a participant had biomarkers levels within the lowest tertile for all four biomarkers then their index equaled zero. The associated HR for the inflammatory biomarker index is interpreted as a tertile (level) increase in any biomarker. We ran models with the inflammatory biomarker index as the primary exposure variable using aforementioned adjustments. We additionally fit models with all biomarkers as exposure variables.

### Abbreviations

BMI: Body Mass Index; CI: Confidence Interval; CRP: C-Reactive Protein; CV: Coefficient of variation; CVD: Human Cardiovascular Disease; HR: Hazard Ratio; IL-6: Interleukin-6; IL-8: Interleukin-8; IL-10: Interleukin-10; JAK: Janus Kinase; NDI: National Death Index; REGARDS: REasons for Geographic and Racial Disparities in Stroke; SD: standard deviation; SSDI: Social Security Death Index; STAT3: Signal transducer and activation of transcription 3; VEGF: Vascular endothelial growth factor.

### Author contributions

TA led the design, analysis, interpretation of data and writing of the manuscript. TA, JM, DD, and SJ contributed to the statistical analysis. TA, JM, DD, MP, SJ, MG, LL, VH, MS, MC, and SG contributed to the interpretation of data and writing and reviewing of the manuscript. All authors have read and approved the final version of the manuscript.

### CONFLICTS OF INTEREST

None.

### FUNDING

The REGARDS study was supported by cooperative agreement U01-NS041588 from the National Institute of Neurological Disorders and Stroke, National Institutes of Health, Department of Health and Human Service. The authors thank the other investigators, the staff, and the participants of the REGARDS study for their valuable contributions. A full list of participating REGARDS investigators and institutions can be found at <http://www.regardsstudy.org>. This analysis was supported by award R01-NR012726 from the National Institute for Nursing Research, UL1-RR025777 from the National Center for Research Resources, K08HL096841 and R01HL080477 from the National Heart, Lung, and Blood Institute, and by grants from the Center for Clinical and Translational Science and the Lister Hill Center for Health Policy of the University of Alabama at Birmingham. Dr. Akinyemiju was supported by grant K01TW010271 from the NIH. Dr. Moore was supported by grants R25CA47888 and T32CA190194 from the National Cancer Institute. The content is solely the responsibility of the authors and does not necessarily represent the official views of the funding agencies. Representatives of the funding agencies have been involved in the review of the manuscript but not directly involved in the collection, management, analysis or interpretation of the data.

### REFERENCES

1. Coussens LM, Werb Z. Inflammation and cancer. *Nature*. 2002; 420:860–67. <https://doi.org/10.1038/nature01322>. [PubMed]
2. Rostom A, Dubé C, Lewin G, Tsertsvadze A, Barrowman N, Code C, Sampson M, Moher D, and U.S. Preventive Services Task Force. Nonsteroidal anti-inflammatory drugs and cyclooxygenase-2 inhibitors for primary prevention of colorectal cancer: a systematic review prepared for the U.S. Preventive Services Task Force. *Ann Intern Med*. 2007; 146:376–89. <https://doi.org/10.7326/0003-4819-146-5-200703060-00010>. [PubMed]
3. Kim S, Shore DL, Wilson LE, Sanniez EI, Kim JH, Taylor JA, Sandler DP. Lifetime use of nonsteroidal anti-inflammatory drugs and breast cancer risk: results from a prospective study of women with a sister with breast cancer. *BMC Cancer*. 2015; 15:960. <https://doi.org/10.1186/s12885-015-1979-1>. [PubMed]
4. González-Pérez A, García Rodríguez LA, López-Ridaura R. Effects of non-steroidal anti-inflammatory drugs on cancer sites other than the colon and rectum: a meta-analysis. *BMC Cancer*. 2003; 3:28. <https://doi.org/10.1186/1471-2407-3-28>. [PubMed]
5. Lee DY, Rhee EJ, Chang Y, Sohn CI, Shin HC, Ryu S, et al. Impact of systemic inflammation on the relationship between insulin resistance and all-cause



- and cancer-related mortality. *Metabolism*. 2018; 81:52–62. <https://doi.org/10.1016/j.metabol.2017.11.014>. [PubMed]
6. England BR, Sokolove J, Robinson WH, Thiele GM, Ganti AK, Sayles H, Michaud K, Caplan L, Davis LA, Cannon GW, Sauer B, Singh N, Blair Solow E, et al. Associations of Circulating Cytokines and Chemokines With Cancer Mortality in Men With Rheumatoid Arthritis. *Arthritis Rheumatol*. 2016; 68:2394–402. <https://doi.org/10.1002/art.39735>. [PubMed]
  7. Ko YJ, Kwon YM, Kim KH, Choi HC, Chun SH, Yoon HJ, Goh E, Cho B, Park M. High-sensitivity C-reactive protein levels and cancer mortality. *Cancer Epidemiol Biomarkers Prev*. 2012; 21:2076–86. <https://doi.org/10.1158/1055-9965.EPI-12-0611>. [PubMed]
  8. Mantovani A, Allavena P, Sica A, Balkwill F. Cancer-related inflammation. *Nature*. 2008; 454:436–44. <https://doi.org/10.1038/nature07205>. [PubMed]
  9. Agnoli C, Gioni S, Pala V, Allione A, Matullo G, Gaetano CD, Tagliabue G, Sieri S, Krogh V. Biomarkers of inflammation and breast cancer risk: a case-control study nested in the EPIC-Varese cohort. *Sci Rep*. 2017; 7:12708. <https://doi.org/10.1038/s41598-017-12703-x>. [PubMed]
  10. Shacter E, Weitzman SA. Chronic inflammation and cancer. *Oncology (Williston Park)*. 2002; 16:217–26, 229; discussion 230-2. [PubMed]
  11. Multhoff G, Molls M, Radons J. Chronic inflammation in cancer development. *Front Immunol*. 2012; 2:98. <https://doi.org/10.3389/fimmu.2011.00098>. [PubMed]
  12. Ridker PM, MacFadyen JG, Thuren T, Everett BM, Libby P, Glynn RJ, Ridker P, Lorenzatti A, Krum H, Varigos J, Siostrzonek P, Sinnaeve P, Fonseca F, et al, and CANTOS Trial Group. Effect of interleukin-1 $\beta$  inhibition with canakinumab on incident lung cancer in patients with atherosclerosis: exploratory results from a randomised, double-blind, placebo-controlled trial. *Lancet*. 2017; 390:1833–42. [https://doi.org/10.1016/S0140-6736\(17\)32247-X](https://doi.org/10.1016/S0140-6736(17)32247-X). [PubMed]
  13. Carroll JF, Fulda KG, Chiapa AL, Rodriguez M, Phelps DR, Cardarelli KM, Vishwanatha JK, Cardarelli R. Impact of race/ethnicity on the relationship between visceral fat and inflammatory biomarkers. *Obesity (Silver Spring)*. 2009; 17:1420–7. <https://doi.org/10.1038/oby.2008.657>. [PubMed]
  14. Silber JH, Rosenbaum PR, Clark AS, Giantonio BJ, Ross RN, Teng Y, Wang M, Niknam BA, Ludwig JM, Wang W, Even-Shoshan O, Fox KR. Characteristics associated with differences in survival among black and white women with breast cancer. *JAMA*. 2013; 310:389–97. <https://doi.org/10.1001/jama.2013.8272>. [PubMed]
  15. Yang M, Kenfield SA, Van Blarigan EL, Batista JL, Sesso HD, Ma J, Stampfer MJ, Chavarro JE. Dietary patterns after prostate cancer diagnosis in relation to disease-specific and total mortality. *Cancer Prev Res (Phila)*. 2015; 8:545–51. <https://doi.org/10.1158/1940-6207.CAPR-14-0442>. [PubMed]
  16. Orlich MJ, Singh PN, Sabaté J, Fan J, Sveen L, Bennett H, Knutsen SF, Beeson WL, Jaceldo-Siegl K, Butler TL, Herring RP, Fraser GE. Vegetarian dietary patterns and the risk of colorectal cancers. *JAMA Intern Med*. 2015; 175:767–76. <https://doi.org/10.1001/jamainternmed.2015.59>. [PubMed]
  17. Yang B, Jacobs EJ, Gapstur SM, Stevens V, Campbell PT. Active smoking and mortality among colorectal cancer survivors: the Cancer Prevention Study II nutrition cohort. *J Clin Oncol*. 2015; 33:885–93. <https://doi.org/10.1200/JCO.2014.58.3831>. [PubMed]
  18. Ferrari P, Licaj I, Muller DC, Kragh Andersen P, Johansson M, Boeing H, Weiderpass E, Dossus L, Dartois L, Fagherazzi G, Bradbury KE, Khaw KT, Wareham N, et al. Lifetime alcohol use and overall and cause-specific mortality in the European Prospective Investigation into Cancer and nutrition (EPIC) study. *BMJ Open*. 2014; 4:e005245. <https://doi.org/10.1136/bmjopen-2014-005245>. [PubMed]
  19. O’Keefe EB, Meltzer JP, Bethea TN. Health disparities and cancer: racial disparities in cancer mortality in the United States, 2000-2010. *Front Public Health*. 2015; 3:51. <https://doi.org/10.3389/fpubh.2015.00051>. [PubMed]
  20. Kolb R, Sutterwala FS, Zhang W. Obesity and cancer: inflammation bridges the two. *Curr Opin Pharmacol*. 2016; 29:77–89. <https://doi.org/10.1016/j.coph.2016.07.005>. [PubMed]
  21. Schmitz KH, Neuhaus ML, Agurs-Collins T, Zanetti KA, Cadmus-Bertram L, Dean LT, Drake BF. Impact of obesity on cancer survivorship and the potential relevance of race and ethnicity. *J Natl Cancer Inst*. 2013; 105:1344–54. <https://doi.org/10.1093/jnci/djt223>. [PubMed]
  22. Akinyemiju T, Moore JX, Pisu M, Judd SE, Goodman M, Shikany JM, Howard VJ, Safford M, Gilchrist SC. A Prospective Study of Obesity, Metabolic Health, and Cancer Mortality. *Obesity (Silver Spring)*. 2018; 26:193–201. <https://doi.org/10.1002/oby.22067>. [PubMed]
  23. Trabert B, Eldridge RC, Pfeiffer RM, Shiels MS, Kemp TJ, Guillemette C, Hartge P, Sherman ME, Brinton LA, Black A, Chaturvedi AK, Hildesheim A, Berndt SI, et al. Prediagnostic circulating inflammation markers and endometrial cancer risk in the prostate, lung, colorectal and ovarian cancer (PLCO) screening trial. *Int J Cancer*. 2017; 140:600–10. <https://doi.org/10.1002/ijc.30478>. [PubMed]
  24. Epplein M, Xiang YB, Cai Q, Peek RM Jr, Li H, Correa P, Gao J, Wu J, Michel A, Pawlita M, Zheng W, Shu XO. Circulating cytokines and gastric cancer risk. *Cancer Causes Control*. 2013; 24:2245–50. <https://doi.org/10.1007/s10552-013-0284-z>. [PubMed]
  25. Berger E, Castagné R, Chadeau-Hyam M, Bochud M, d’Errico A, Gandini M, Karimi M, Kivimäki M, Krogh V, Marmot M, Panico S, Preisig M, Ricceri F, et al.

- Multi-cohort study identifies social determinants of systemic inflammation over the life course. *Nat Commun.* 2019; 10:773. <https://doi.org/10.1038/s41467-019-08732-x>. [PubMed]
26. Grivennikov SI, Karin M. Inflammatory cytokines in cancer: tumour necrosis factor and interleukin 6 take the stage. *Ann Rheum Dis.* 2011; 70:i104–08. <https://doi.org/10.1136/ard.2010.140145>. [PubMed]
27. Studebaker AW, Storci G, Werbeck JL, Sansone P, Sasser AK, Tavolari S, Huang T, Chan MW, Marini FC, Rosol TJ, Bonafè M, Hall BM. Fibroblasts isolated from common sites of breast cancer metastasis enhance cancer cell growth rates and invasiveness in an interleukin-6-dependent manner. *Cancer Res.* 2008; 68:9087–95. <https://doi.org/10.1158/0008-5472.CAN-08-0400>. [PubMed]
28. Martín F, Santolaria F, Batista N, Milena A, González-Reimers E, Brito MJ, Oramas J. Cytokine levels (IL-6 and IFN- $\gamma$ ), acute phase response and nutritional status as prognostic factors in lung cancer. *Cytokine.* 1999; 11:80–86. <https://doi.org/10.1006/cyto.1998.0398>. [PubMed]
29. Necula LG, Chivu-Economescu M, Stanciulescu EL, Bleotu C, Dima SO, Alexiu I, Dumitru A, Constantinescu G, Popescu I, Diaconu CC. IL-6 and IL-11 as markers for tumor aggressiveness and prognosis in gastric adenocarcinoma patients without mutations in Gp130 subunits. *J Gastrointestin Liver Dis.* 2012; 21:23–29. [PubMed]
30. Zhang GJ, Adachi I. Serum interleukin-6 levels correlate to tumor progression and prognosis in metastatic breast carcinoma. *Anticancer Res.* 1999; 19:1427–32. [PubMed]
31. Singh JK, Simões BM, Howell SJ, Farnie G, Clarke RB. Recent advances reveal IL-8 signaling as a potential key to targeting breast cancer stem cells. *Breast Cancer Res.* 2013; 15:210. <https://doi.org/10.1186/bcr3436>. [PubMed]
32. Chen Y, Shi M, Yu GZ, Qin XR, Jin G, Chen P, Zhu MH. Interleukin-8, a promising predictor for prognosis of pancreatic cancer. *World J Gastroenterol.* 2012; 18:1123–29. <https://doi.org/10.3748/wjg.v18.i10.1123>. [PubMed]
33. Chen ZY, He WZ, Peng LX, Jia WH, Guo RP, Xia LP, Qian CN. A prognostic classifier consisting of 17 circulating cytokines is a novel predictor of overall survival for metastatic colorectal cancer patients. *Int J Cancer.* 2015; 136:584–92. <https://doi.org/10.1002/ijc.29017>. [PubMed]
34. Milovanovic J, Todorovic-Rakovic N, Abu Rabi Z. The prognostic role of interleukin-8 (IL-8) and matrix metalloproteinases -2 and -9 in lymph node-negative untreated breast cancer patients. *J BUON.* 2013; 18:866–73.
35. Lippitz BE, Harris RA. Cytokine patterns in cancer patients: A review of the correlation between interleukin 6 and prognosis. *OncoImmunology.* 2016; 5:e1093722. <https://doi.org/10.1080/2162402X.2015.1093722>. [PubMed]
36. Benoy IH, Salgado R, Van Dam P, Geboers K, Van Marck E, Scharpé S, Vermeulen PB, Dirix LY. Increased serum interleukin-8 in patients with early and metastatic breast cancer correlates with early dissemination and survival. *Clin Cancer Res.* 2004; 10:7157–62. <https://doi.org/10.1158/1078-0432.CCR-04-0812>. [PubMed]
37. Zhao S, Wu D, Wu P, Wang Z, Huang J. Serum IL-10 Predicts Worse Outcome in Cancer Patients: A Meta-Analysis. *PLoS One.* 2015; 10:e0139598. <https://doi.org/10.1371/journal.pone.0139598>. [PubMed]
38. Wang R, Lu M, Zhang J, Chen S, Luo X, Qin Y, Chen H. Increased IL-10 mRNA expression in tumor-associated macrophage correlated with late stage of lung cancer. *J Exp Clin Cancer Res.* 2011; 30:62. <https://doi.org/10.1186/1756-9966-30-62>. [PubMed]
39. Wu JM, Bensen-Kennedy D, Miura Y, Thoburn CJ, Armstrong D, Vogelsang GB, Hess AD. The effects of interleukin 10 and interferon gamma cytokine gene polymorphisms on survival after autologous bone marrow transplantation for patients with breast cancer. *Biol Blood Marrow Transplant.* 2005; 11:455–64. <https://doi.org/10.1016/j.bbmt.2005.03.008>. [PubMed]
40. Hayashi T, Yamashita T, Terashima T, Suda T, Okada H, Asahina Y, Hayashi T, Hara Y, Nio K, Sunagozaka H, Takatori H, Arai K, Sakai Y, et al. Serum cytokine profiles predict survival benefits in patients with advanced hepatocellular carcinoma treated with sorafenib: a retrospective cohort study. *BMC Cancer.* 2017; 17:870. <https://doi.org/10.1186/s12885-017-3889-x>. [PubMed]
41. Enewold L, Mechanic LE, Bowman ED, Zheng YL, Yu Z, Trivers G, Alberg AJ, Harris CC. Serum concentrations of cytokines and lung cancer survival in African Americans and Caucasians. *Cancer Epidemiol Biomarkers Prev.* 2009; 18:215–22. <https://doi.org/10.1158/1055-9965.EPI-08-0705>. [PubMed]
42. Morrison L, Laukkanen JA, Ronkainen K, Kurl S, Kauhanen J, Toriola AT. Inflammatory biomarker score and cancer: A population-based prospective cohort study. *BMC Cancer.* 2016; 16:80. <https://doi.org/10.1186/s12885-016-2115-6>. [PubMed]
43. Singh-Manoux A, Shipley MJ, Bell JA, Canonico M, Elbaz A, Kivimäki M. Association between inflammatory biomarkers and all-cause, cardiovascular and cancer-related mortality. *CMAJ.* 2017; 189:E384–90. <https://doi.org/10.1503/cmaj.160313>. [PubMed]
44. Kim HS, Chen YC, Nör F, Warner KA, Andrews A, Wagner VP, Zhang Z, Zhang Z, Martins MD, Pearson AT, Yoon E, Nör JE. Endothelial-derived interleukin-6 induces cancer stem cell motility by generating a chemotactic gradient towards blood vessels. *Oncotarget.* 2017; 8:100339–52. <https://doi.org/10.18632/oncotarget.22225>. [PubMed]
45. Todorović-Raković N, Milovanović J. Interleukin-8 in breast cancer progression. *J Interferon Cytokine Res.* 2013; 33:563–70. <https://doi.org/10.1089/jir.2013.0023>. [PubMed]
46. Wang SW, Sun YM. The IL-6/JAK/STAT3 pathway: potential therapeutic strategies in treating colorectal cancer (Review). *Int J Oncol.* 2014; 44:1032–40. <https://doi.org/10.3892/ijo.2014.2259>. [PubMed]

47. Buck BH, Liebeskind DS, Saver JL, Bang OY, Starkman S, Ali LK, Kim D, Villablanca JP, Salamon N, Yun SW, Razinia T, Ovbiagele B. Association of higher serum calcium levels with smaller infarct volumes in acute ischemic stroke. *Arch Neurol.* 2007; 64:1287–91. <https://doi.org/10.1001/archneur.64.9.1287>. [PubMed]
48. Cushman M, Judd SE, Howard VJ, Kissela B, Gutiérrez OM, Jenny NS, Ahmed A, Thacker EL, Zakai NA. N-terminal pro-B-type natriuretic peptide and stroke risk: the reasons for geographic and racial differences in stroke cohort. *Stroke.* 2014; 45:1646–50. <https://doi.org/10.1161/STROKEAHA.114.004712>. [PubMed]
49. Panwar B, Jenny NS, Howard VJ, Wadley VG, Muntner P, Kissela BM, Judd SE, Gutiérrez OM. Fibroblast growth factor 23 and risk of incident stroke in community-living adults. *Stroke.* 2015; 46:322–28. <https://doi.org/10.1161/STROKEAHA.114.007489>. [PubMed]
50. Zakai NA, Judd SE, Alexander K, McClure LA, Kissela BM, Howard G, Cushman M. ABO blood type and stroke risk: the reasons for geographic and racial differences in stroke study. *J Thromb Haemost.* 2014; 12:564–70. <https://doi.org/10.1111/jth.12507>. [PubMed]
51. Glymour MM, Kosheleva A, Boden-Albala B. Birth and adult residence in the Stroke Belt independently predict stroke mortality. *Neurology.* 2009; 73:1858–65. <https://doi.org/10.1212/WNL.0b013e3181c47cad>. [PubMed]
52. Howard VJ, Kleindorfer DO, Judd SE, McClure LA, Safford MM, Rhodes JD, Cushman M, Moy CS, Soliman EZ, Kissela BM, Howard G. Disparities in stroke incidence contributing to disparities in stroke mortality. *Ann Neurol.* 2011; 69:619–27. <https://doi.org/10.1002/ana.22385>. [PubMed]
53. Safford MM, Brown TM, Muntner PM, Durant RW, Glasser S, Halanych JH, Shikany JM, Prineas RJ, Samdarshi T, Bittner VA, Lewis CE, Gamboa C, Cushman M, et al, and REGARDS Investigators. Association of race and sex with risk of incident acute coronary heart disease events. *JAMA.* 2012; 308:1768–74. <https://doi.org/10.1001/jama.2012.14306>. [PubMed]
54. Huntington JT, Butterfield M, Fisher J, Torrent D, Bloomston M. The Social Security Death Index (SSDI) most accurately reflects true survival for older oncology patients. *Am J Cancer Res.* 2013; 3:518–22. [PubMed]
55. Quinn J, Kramer N, McDermott D. Validation of the Social Security Death Index (SSDI): An Important Readily-Available Outcomes Database for Researchers. *West J Emerg Med.* 2008; 9:6–8. [PubMed]
56. Curb JD, Ford CE, Pressel S, Palmer M, Babcock C, Hawkins CM. Ascertainment of vital status through the National Death Index and the Social Security Administration. *Am J Epidemiol.* 1985; 121:754–66. <https://doi.org/10.1093/aje/121.5.754>. [PubMed]
57. Lauby-Secretan B, Scoccianti C, Loomis D, Grosse Y, Bianchini F, Straif K, and International Agency for Research on Cancer Handbook Working Group. Body Fatness and Cancer—Viewpoint of the IARC Working Group. *N Engl J Med.* 2016; 375:794–98. <https://doi.org/10.1056/NEJMsr1606602>. [PubMed]
58. Ligibel JA, Alfano CM, Courneya KS, Demark-Wahnefried W, Burger RA, Chlebowski RT, Fabian CJ, Gucalp A, Hershman DL, Hudson MM, Jones LW, Kakarala M, Ness KK, et al. American Society of Clinical Oncology position statement on obesity and cancer. *J Clin Oncol.* 2014; 32:3568–74. <https://doi.org/10.1200/JCO.2014.58.4680>. [PubMed]
